# Supplementary material for: Interaction of Tau construct K18 with model lipid membranes
Source: Royal Society of Chemistry journal article supplement (doi:10.1039/d1na00055a), 2021-01-01
Supplement: d1na00055a1.pdf [file d1na00055a1.pdf]

## Supplementary material

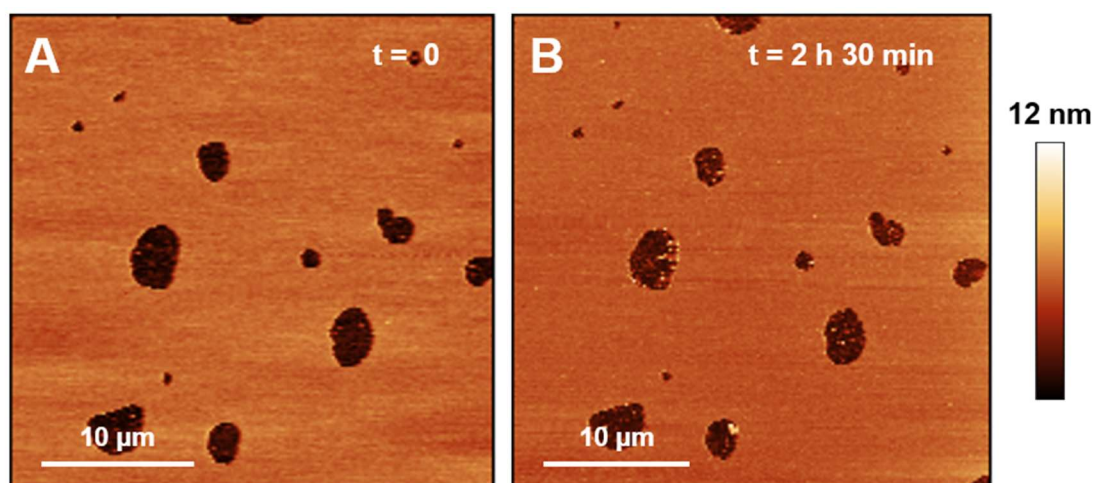

**Figure S1** - AFM images of a pure POPC bilayer imaged at  $t = 0$  (A) and after  $\sim 2\text{h}30$  of imaging (B).

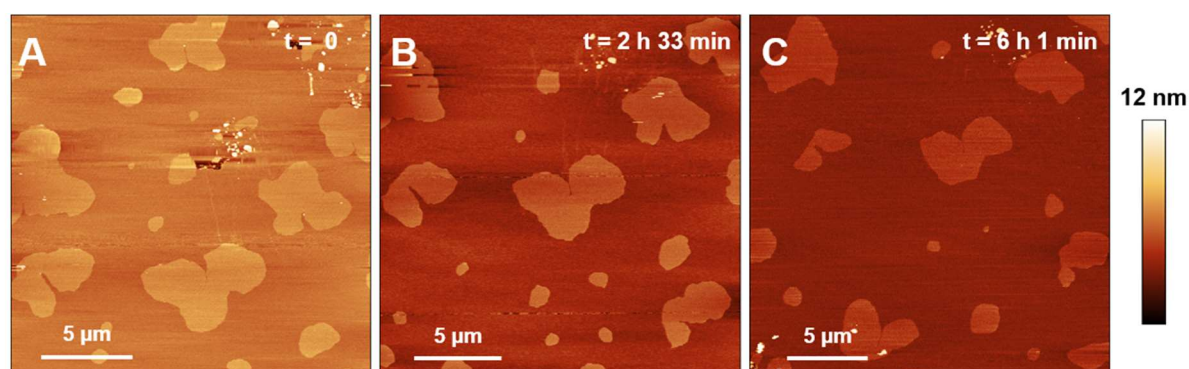

**Figure S2** - AFM images of a DOPC/DPPC (1/1) bilayer at  $t = 0$  (A) and after  $\sim 2\text{h}30$  (B) and 6h of imaging (C).

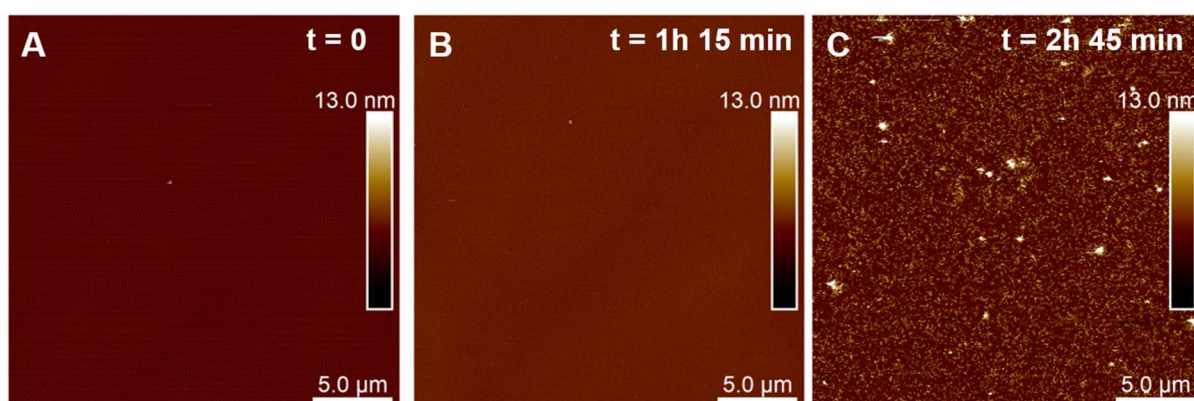

**Figure S3** - AFM images of a mica substrate imaged at the time of injection of K18 (1  $\mu\text{M}$  final concentration) (A) and after 1h15min (B) and 2h45min of incubation (C).

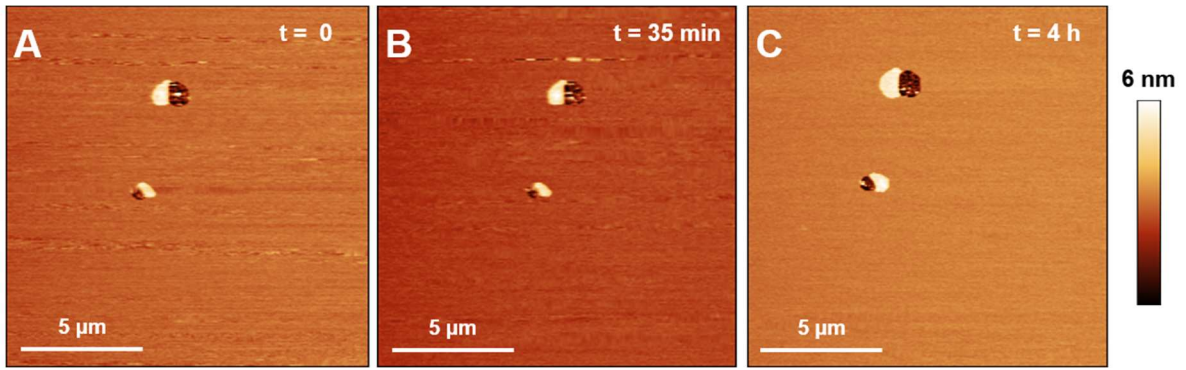

**Figure S4** - AFM images of a POPC-POPS (4-1) bilayer at  $t = 0$  (**A**) and after  $\sim 35$  min (**B**) and 4 h of imaging (**C**).
